# Supplementary material for: Profiling the Targets of Protective CD8+ T Cell Responses to Infection
Source: PubMed Central journal article supplement (PMC5602877; doi:10.1016/j.omtm.2017.08.003), 2017-08-18
Supplement: mmc1.pdf [file mmc1.pdf]

**OMTM, Volume 7**

## **Supplemental Information**

### **Profiling the Targets of Protective**

### **CD8<sup>+</sup> T Cell Responses to Infection**

**Joseph T. Bruder, Ping Chen, Greg Ekberg, Emily C. Smith, Christopher A. Lazarski, Bennett A. Myers, Jessica Bolton, Martha Sedegah, Eileen Villasante, Thomas L. Richie, C. Richter King, Joao C. Aguiar, Denise L. Doolan, and Douglas E. Brough**

**Supplemental Information:**

**Table S1. Vector yields on various size plates**

| Plate Size | Adg. <i>Py</i> HEP17 |           | Adg.CMVp65 |           |
|------------|----------------------|-----------|------------|-----------|
|            | ffu/ml               | ffu total | ffu/ml     | ffu total |
| 60 mm      | 3.10E+08             | 1.30E+09  | 8.20E+08   | 3.44E+09  |
| 6 well     | 4.55E+08             | 9.55E+08  | 6.70E+08   | 1.41E+09  |
| 12 well    | 9.00E+08             | 7.56E+08  | 1.10E+09   | 9.24E+08  |
| 24 well    | 1.33E+09             | 5.59E+08  | 1.02E+09   | 4.28E+08  |
| 48 well    | 1.38E+09             | 5.80E+07  | 1.27E+09   | 5.30E+07  |
| 96 well    | 1.26E+09             | 2.26E+07  | 1.19E+09   | 2.10E+07  |

**Table S2. Thirteen antigens that recalled CD8<sup>+</sup> T cell responses more frequent than CSP from mice immunized with *P. yoelii* SPZ+CQ**

| Rank | Gene ID<br><i>P. yoelii</i> | Gene ID<br><i>P. falciparum</i> | %<br>Identity <sup>a</sup> | <i>P. yoelii</i> Protein<br>Name - Function                        | Liver stage active genes<br>from Tarum et al., 2008 |          |
|------|-----------------------------|---------------------------------|----------------------------|--------------------------------------------------------------------|-----------------------------------------------------|----------|
|      |                             |                                 |                            |                                                                    | Transcriptome<br>Clusters <sup>h</sup>              | Proteome |
| 1    | PY02605                     | PF3D7_0932900                   | 40                         | Hypothetical Protein                                               | C3                                                  | -        |
| 2    | PY02989                     | PF3D7_0212800                   | 47                         | Hypothetical Protein <sup>b</sup>                                  | C4                                                  | -        |
| 3    | PY02326                     | PF3D7_1309500                   | 74                         | snornp protein gar1 <sup>c</sup>                                   | C3                                                  | +        |
| 4    | PY02030                     | PF3D7_0624000                   | 86                         | hexokinase                                                         |                                                     | +        |
| 5    | PY00629                     | PF3D7_0108300                   | 33                         | asparagine-rich protein,<br>putative                               |                                                     | +        |
| 6    | PY07062                     | PF3D7_1446400                   | 82                         | pyruvate dehydrogenase<br>E1 beta subunit                          | C3                                                  | +        |
| 7    | PY00361                     | PF3D7_1357100                   | 99                         | translation elongation<br>factor EF-1, subunit<br>alpha            |                                                     | +        |
| 8    | PY04421                     | PF3D7_1121600                   | 56                         | U43539 hepatocyte<br>erythrocyte protein 17<br>kDa <sup>d</sup>    | C3                                                  | +        |
| 9    | PY05048                     | PF3D7_1108400                   | 95                         | Protein kinase domain <sup>e</sup>                                 |                                                     | +        |
| 10   | PY07825                     | PF3D7_0814200                   | 86                         | Arabidopsis thaliana<br>At1g20220/T20H2_3-<br>related <sup>f</sup> | C3                                                  | +        |
| 11   | PY05748                     | PF3D7_0930300                   | 32                         | merozoite surface<br>protein 1 precursor                           | C1                                                  | -        |
| 12   | PY04475                     | PF3D7_0621200                   | 86                         | ethylene-inducible<br>protein hever <sup>g</sup>                   |                                                     | +        |
| 13   | PY02148                     | PF3D7_1334600                   | 31                         | merozoite surface<br>protein 7 precursor                           | C1                                                  | -        |

<sup>a</sup> Percent identity between *P. falciparum* and *P. yoelii* orthologues established using blastpp suite-2sequences, National Center for Biotechnology Information.

<sup>b</sup> *P. falciparum* protein function is multidrug efflux pump, putative.

<sup>c</sup> *P. falciparum* protein function is H/ACA ribonucleoprotein complex subunit 1, putative.

<sup>d</sup> *P. falciparum* protein function is exported protein 1.

<sup>e</sup> *P. falciparum* protein function is casein kinase 2, alpha subunit.

<sup>f</sup> *P. falciparum* protein function is DNA/RNA-binding protein Alba 1.

<sup>g</sup> *P. falciparum* protein function pyridoxine biosynthesis protein PDX1.

<sup>h</sup> Clusters from Tarum *et al.*, 2008 - C1 includes LS genes mainly up-regulated in LS24 compared with LS40 and LS50, but that were also expressed in the mosquito and erythrocytic stages. C2 encompassed genes that were mainly up-regulated at LS24; C3 showed most of the genes up-regulated in all three LS time points queried. C4 showed genes mainly up-regulated in LS40 and LS50.
